# Supplementary material
Source: Royal Society of Chemistry journal article supplement (doi:10.1039/d6ey00068a)
Supplement: d6ey00068a1.pdf [file d6ey00068a1.pdf]

## Supporting Information

### Engineering a layered-differentiation core-shell architecture: NiCoAlO<sub>x</sub>@Pt/ZSM-5 for synergistically enhanced activity and dual H<sub>2</sub>O/SO<sub>2</sub> resistance in propane oxidation

Shixing Wu<sup>a, b#</sup>, Qian Peng<sup>a, c#</sup>, Chao Feng<sup>d</sup>, Haitao Zhang<sup>e</sup>, Zhifang Zhou<sup>c\*</sup>, Fang  
Dong<sup>a\*</sup>, Zhicheng Tang<sup>a\*</sup>

*(a. National Engineering Research Center for Fine Petrochemical Intermediates,  
State Key Laboratory of Low Carbon Catalysis and Carbon Dioxide Utilization,  
Lanzhou Institute of Chemical Physics, Chinese Academy of Sciences, Lanzhou  
730000, China;*

*b. University of Chinese Academy of Sciences, Beijing 100039, China;*

*c. School of Metallurgy and Environment, Lanzhou University of Technology,  
Lanzhou 730050, China;*

*d. College of Chemical and Biological Engineering, Shandong University of Science  
and Technology, Qingdao, Shandong 266590, China;*

*e. Lanzhou Petrochemical Research Center, Petrochemical Research Institute,  
PetroChina, Lanzhou 730060, China.)*

*#These authors contributed equally: Shixing Wu, Qian Peng.*

---

\*Corresponding author.

E-mail address: zhouzf@lut.edu.cn (Z. Zhou), dongfang@licp.cas.cn (F. Dong),

tangzhicheng@licp.cas.cn (Z. Tang).

## 1. Chemical reagents

Nickel nitrate hexahydrate ( $\text{Ni}(\text{NO}_3)_2 \cdot 6\text{H}_2\text{O}$ ), cobalt nitrate hexahydrate ( $\text{Co}(\text{NO}_3)_2 \cdot 6\text{H}_2\text{O}$ ), aluminum nitrate hydrate ( $\text{Al}(\text{NO}_3)_3 \cdot 9\text{H}_2\text{O}$ ), chloroplatinic acid hexahydrate ( $\text{H}_2\text{PtCl}_6 \cdot 6\text{H}_2\text{O}$ ), sodium hydroxide ( $\text{NaOH}$ ) and *n*-butylamine ( $\text{C}_4\text{H}_{11}\text{N}$ ) were purchased from Xilong Chemical Co. Ltd., Chengdu Cologne Chemical Co. Ltd., Xilong Science Co. Ltd., Chengdu Cologne Chemical Co. Ltd., Beijing Beihua Fine Chemicals Co. Ltd. and Shanghai McLean Biochemical Technology Co. Ltd., respectively. Water glass ( $\text{Na}_2\text{O} \cdot n\text{SiO}_2$ ) was composed of 250 g/L  $\text{SiO}_2$ , 90 g/L  $\text{Na}_2\text{O}$  and water. Ethanol was purchased from LianlongBohua (Tianjin) Pharmaceutical Chemicals Co. Ltd. and distilled water was made in the laboratory. All chemical materials were analytically pure reagents and used without further purification.

## 2. Experimental

### 2.1. Synthesis of $\text{Pt}/\text{Ni}_a\text{Co}_b\text{AlO}_x$ catalysts

For the synthesis of  $\text{Pt}/\text{Ni}_1\text{Co}_{0.5}\text{AlO}_x$  catalyst,  $\text{Ni}(\text{NO}_3)_2 \cdot 6\text{H}_2\text{O}$  (3.102 g, 10.67 mmol),  $\text{Co}(\text{NO}_3)_2 \cdot 6\text{H}_2\text{O}$  (1.552 g, 5.33 mmol) and  $\text{Al}(\text{NO}_3)_3 \cdot 9\text{H}_2\text{O}$  (1.999 g, 5.33 mmol) were dissolved in 20 mL of deionized water under ultrasonic agitation for 10 min to form solution A. Separately,  $\text{H}_2\text{PtCl}_4$  solution (38.6 mmol/L, 1.00 mL) and  $\text{NaOH}$  (1.366 g, 34.15 mmol) were ultrasonically dissolved in another 20 mL of deionized water to form solution B.

### 2.2. Synthesis of $\text{Pt}/\text{Ni}_1\text{Co}_{0.5}\text{AlO}_x@ZSM-5(5\%)$ catalyst

To synthesize the ZSM-5 shell with a 5 wt% loading, water glass (0.333 g) and *n*-butylamine (0.026 g) were dissolved in 10 mL of distilled water and stirred vigorously for 10 min (solution C). Simultaneously,  $\text{Pt}/\text{Ni}_1\text{Co}_{0.5}\text{AlO}_x$  core (1.430 g) was dispersed

in another 10 mL of distilled water to form a homogeneous suspension (suspension D). Suspension D was then added dropwise to solution C under vigorous stirring at room temperature for 30 min, followed by the addition of an extra 10 mL of distilled water and continued stirring for 1.5 h.

### **2.3. Synthesis of $\text{Ni}_1\text{Co}_{0.5}\text{AlO}_x@\text{Pt}/\text{ZSM-5}(3\%)$ , $\text{Ni}_1\text{Co}_{0.5}\text{AlO}_x@\text{Pt}/\text{ZSM-5}(5\%)$ and $\text{Ni}_1\text{Co}_{0.5}\text{AlO}_x@\text{Pt}/\text{ZSM-5}(10\%)$ catalysts**

The  $\text{Ni}_1\text{Co}_{0.5}\text{AlO}_x$  core was synthesized via the same procedure as the  $\text{Pt}/\text{Ni}_1\text{Co}_{0.5}\text{AlO}_x$  catalyst, except that no  $\text{H}_2\text{PtCl}_4$  solution was added to solution B during the preparation of the  $\text{Ni}_1\text{Co}_{0.5}\text{Al-LDH}$  precursor. Additionally, 1.00 mL of  $\text{H}_2\text{PtCl}_4$  solution was introduced into suspension D to achieve a theoretical Pt loading of 0.5 wt% for all samples. Specifically, to prepare  $\text{Ni}_1\text{Co}_{0.5}\text{AlO}_x@\text{Pt}/\text{ZSM-5}(3\%)$ , (5%), and (10%), the dosages of water glass, *n*-butylamine and  $\text{Ni}_1\text{Co}_{0.5}\text{AlO}_x$  core were (0.184 g, 0.014 g and 1.455 g), (0.333 g, 0.026 g and 1.430 g) and (0.700 g, 0.054 g and 1.350 g), respectively.

### **3. Catalytic performance measurements**

The catalytic activity and stability of the catalysts for VOCs oxidation were evaluated in a fixed-bed continuous-flow reactor using propane as the probe molecule. For the activity tests, 400 mg of catalyst (20-40 mesh, obtained by pressing and sieving) was thoroughly mixed with 200 mg of  $\text{SiO}_2$ . The mixture was loaded into the isothermal zone (packed with quartz wool) of a quartz reactor tube (length: 30 cm; inner diameter: 8 mm). A reactant gas stream containing 2000 ppm propane in air was introduced at a flow rate of 200 mL/min, corresponding to a weight hourly space velocity (WHSV) of

30000 mL·g<sup>-1</sup>·h<sup>-1</sup>. The catalytic reaction was conducted at various temperatures, and the concentrations of reactants and products were monitored online using a gas chromatograph (FULI GC9790II) equipped with a flame ionization detector (FID). Propane conversion and CO<sub>2</sub> selectivity were calculated based on the measured concentrations using the standard equations.

$$X_{C_3H_8} = \frac{[C_3H_8]_{in} - [C_3H_8]_{out}}{[C_3H_8]_{in}} \times 100\%$$

$$CO_2 \text{ selectivity} = \frac{[CO_2]_{out}}{([C_3H_8]_{in} - [C_3H_8]_{out}) \times 3} \times 100\%$$

Here,  $X_{C_3H_8}$ ,  $[C_3H_8]_{in}$ ,  $[C_3H_8]_{out}$  and  $[CO_2]_{out}$  represented conversion of propane, inlet concentration of propane, outlet concentration of propane, and outlet concentration of CO<sub>2</sub>, respectively. The catalytic stability test followed the same procedure as the activity test, except that the reaction temperature was maintained to ensure a high propane conversion (85.0-95.0%) for a long time.

#### 4. Catalyst characterizations

The morphology of the catalysts was analyzed by transmission electron microscopy (TEM, JEOL-JEM-2010). Brunauer-Emmett-Teller (BET) surface area, the pore size, and the pore volume of the catalysts were obtained by adsorption and desorption of nitrogen in the ASAP 2020 instrument (America Micromeritics). Raman scattering was done by using a Laboratory Human Resources Evolution Raman spectrometer (BX41). The crystal phases of each element in the catalyst were determined by an X-ray diffraction instrument (XRD, Japan Smartlabse) (scanning angle of 10°-90°, scanning speed of 0.5°/min, 60 kV, 55 mA) under the radiation of  $\lambda$

= 1.5406 nm. The Fourier transform infrared spectroscopy (FTIR) analysis of the samples was performed using a Fourier infrared spectrometer (Nexus 870, Nicolet), and ATR technology was used for FTIR analysis. Infrared spectra were tested with a Nicolet Nexus 870 Fourier transform infrared spectrometer. X-ray photoelectron spectroscopy (XPS) measurements were performed with a Thermo Scientific 250 Xi Electron Spectrometer (Mg K $\alpha$  radiation;  $h\nu = 1253.6$  eV). The multifunctional dynamic adsorption instrument TP-5080-D was used to analyze the redox behavior, surface acidity, and oxygen species characteristics of the catalyst surface. For H<sub>2</sub>-TPR, a 50 mg sample was heated from room temperature to 900 °C in reduced gas with volume fractions of 5 vol % H<sub>2</sub> and 95 vol % N<sub>2</sub>, and the detector signal was continuously recorded. For the O<sub>2</sub>-TPD test, the catalyst (50 mg) was pretreated with nitrogen (99.9%) for 1 h at 300 °C. When the temperature dropped to 50 °C, the O<sub>2</sub> (5% O<sub>2</sub>/N<sub>2</sub>) adsorption was carried out for 60 min. After the adsorption was over, purged for 0.5 h, and the desorbed O<sub>2</sub> signal was detected at 50-900 °C. The temperature-programmed desorption operation of NH<sub>3</sub>-TPD was similar to that of O<sub>2</sub>-TPD, except that O<sub>2</sub> was changed to NH<sub>3</sub> and the desorbed NH<sub>3</sub> signal was detected at 50-800 °C. The H<sub>2</sub>-TPR data in Fig. S13 were calibrated by pure CuO as a standard. The following reaction equation shows that 1 mol CuO consumes 1 mol H<sub>2</sub>. We performed H<sub>2</sub>-TPR tests on CuO of different masses to obtain H<sub>2</sub> consumption and peak area. The peak area (Y) and H<sub>2</sub> consumption (X) were linearly fitted to obtain the linear equation shown in Fig. S13. The peak area obtained by the TPR peak fitting of different catalysts was put into the equation to obtain the H<sub>2</sub> consumption.

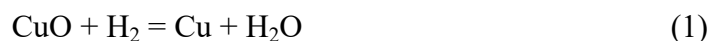

In-situ diffuse reflectance infrared Fourier transform spectroscopy (DRIFTS) spectra of reaction behaviors of  $\text{C}_3\text{H}_8$  over the  $\text{Ni}_1\text{Co}_{0.5}\text{AlO}_x@\text{Pt}/\text{ZSM-5}(3\%)$  catalyst under both air and  $\text{SO}_2$ -containing atmospheres were collected using a VERTEX 70 spectrometer equipped with an MCT detector and a  $\text{CaF}_2$  window in-situ cell. The DRIFTS cell served as the reaction chamber, and spectra were collected in the frequency range of  $4000\text{-}600\text{ cm}^{-1}$ . For  $\text{C}_3\text{H}_8$  oxidation under air, a total of 200 mg of catalyst (40-60 mesh) was packed into the DRIFTS cell. Firstly, the catalyst was pretreated at  $400\text{ }^\circ\text{C}$  by flowing  $\text{N}_2$  for 30 minutes. After cooling to  $40\text{ }^\circ\text{C}$ , the catalyst was exposed to a  $\text{C}_3\text{H}_8/\text{Ar}$  gas mixture containing 2000 ppm  $\text{C}_3\text{H}_8$  at a flow rate of 30 mL/min until adsorption saturation was achieved. Subsequently,  $\text{N}_2$  was introduced to purge the weakly adsorbed species. Lastly,  $\text{N}_2$  was switched to 20%  $\text{O}_2/\text{N}_2$  mixture with a flow rate of 30 mL/min and the catalyst was oxidized at different temperatures ( $100\text{ }^\circ\text{C}$ ,  $150\text{ }^\circ\text{C}$ ,  $200\text{ }^\circ\text{C}$ ,  $250\text{ }^\circ\text{C}$ ,  $300\text{ }^\circ\text{C}$ , and  $350\text{ }^\circ\text{C}$ ) with a heating rate of  $10\text{ }^\circ\text{C}/\text{min}$ , during which the spectra were recorded. For  $\text{C}_3\text{H}_8$  oxidation under  $\text{SO}_2$ -containing atmosphere, the experimental procedure was identical to that under air, except that the reaction gas was replaced with air containing 30 ppm  $\text{SO}_2$  after  $\text{N}_2$  purging.

**Supplementary analysis concerning BET in the manuscript is as follows:**

The  $\text{Pt}/\text{Ni}_1\text{Co}_{0.5}\text{AlO}_x@\text{ZSM-5}(5\%)$ ,  $\text{Ni}_1\text{Co}_{0.5}\text{AlO}_x@\text{Pt}/\text{ZSM-5}(5\%)$ , and  $\text{Ni}_1\text{Co}_{0.5}\text{AlO}_x@\text{Pt}/\text{ZSM-5}(10\%)$  catalysts exhibited combined type I/IV isotherms with H4 hysteresis loops. The I and IV combined isotherms indicated both the microporosity and mesoporosity, and H4 hysteresis loop represented narrow slit-shaped pores usually

found in solids with a mixture of microporous and mesoporous, demonstrating that Pt/Ni<sub>1</sub>Co<sub>0.5</sub>AlO<sub>x</sub>@ZSM-5(5%), Ni<sub>1</sub>Co<sub>0.5</sub>AlO<sub>x</sub>@Pt/ZSM-5(5%) and Ni<sub>1</sub>Co<sub>0.5</sub>AlO<sub>x</sub>@Pt/ZSM-5(10%) catalysts were composites of ZSM-5 and hydrotalcite-derived oxides.

## 5. Kinetic studies

The catalytic performance could also be identified by kinetic studies, such as apparent activation energy ( $E_a$ ), which is measured as follows:

$$\ln r = \frac{-E_a}{RT} + C \quad (2)$$

In equation (2),  $r$  represents the reaction rate ( $\text{mol}\cdot\text{g}^{-1}\cdot\text{s}^{-1}$ ),  $T$  refers to the reaction temperature, and  $C$  is a constant term.

$$r = \frac{F_{Propane} \times X_{Propane}}{W} \quad (3)$$

In equation (3),  $X_{Propane}$  denotes the conversion of  $\text{C}_3\text{H}_8$ ,  $F_{Propane}$  indicates the feeding rate ( $\text{mol}\cdot\text{s}^{-1}$ ), and  $W$  corresponds to the mass of the catalyst. Therefore, the plots of  $\ln r$  and  $1000/T$  yield the  $E_a$  value.

The kinetic studies also include specific reaction rates, such as the catalyst's mass ( $R_m$ ) and the catalyst's specific surface area ( $R_s$ ), which were calculated using the following equations:

$$\eta_{Propane} = \log \frac{1}{1 - \frac{X_{Propane}}{100}} \quad (4)$$

$$R_s = \frac{F \times \eta_{Propane}}{S} \quad (5)$$

$$R_m = \frac{F \times \eta_{Propane}}{W} \quad (6)$$

Turnover frequency (TOF), defined as the number of C<sub>3</sub>H<sub>8</sub> molecules converted per active site per second, was calculated according to the equation:

$$TOF_{Pt} = \frac{F_{Propane} \times X_{Propane}}{\frac{m_{Cat} \times x(Pt)}{M_{Pt}} \times d(Pt)} \quad (7)$$

$$TOF_{Ni} = \frac{F_{Propane} \times X_{Propane}}{\frac{m_{Cat} \times x(Ni)}{M_{Ni}} \times d(Ni)} \quad (8)$$

$$TOF_{Co} = \frac{F_{Propane} \times X_{Propane}}{\frac{m_{Cat} \times x(Co)}{M_{Co}} \times d(Co)} \quad (9)$$

Where  $F_{propane}$  is the C<sub>3</sub>H<sub>8</sub> flow rate (mol/s),  $X_{propane}$  is the conversion of C<sub>3</sub>H<sub>8</sub>,  $m_{Cat}$  is the mass of the catalyst (g),  $M_{Pt}$ ,  $M_{Ni}$ ,  $M_{Co}$  (g/mol) are the molar of Pt (195.05 g/mol), Ni (58.69 g/mol), Co (58.93 g/mol), respectively;  $d(Pt)$ ,  $d(Ni)$  and  $d(Co)$  are the dispersions of Pt, Ni and Co, which are calculated from the ratios of  $Pt^0/Pt_{total}$ ,  $Ni^{3+}/Ni_{total}$  and  $Co^{3+}/Co_{total}$  in the XPS spectra, respectively;  $x(Pt)$ ,  $x(Ni)$  and  $x(Co)$  are the total contents of Pt, Ni and Co in various samples (obtained by XPS experiments), respectively.

## 6. Theoretical calculations

All calculations were performed using the density functional theory (DFT) technique using the Vienna ab initio simulation package (VASP). Spin-polarized calculations were performed using the generalized gradient approximation (GGA) combined with the Perdew-Burke-Ernzerhof (PBE) method to determine the exchange and correlation energies. The projector-augmented wave (PAW) method was used to

represent the core–valence electron interactions. The typical plane-wave cutoff energy was 400 eV for basis-set expansion. For geometry optimization calculations, forces were converged below 0.03 eV/Å. The SCF convergence energy was  $1 \times 10^{-4}$  eV. A  $1 \times 1 \times 1$  k-point mesh was used to perform all the calculations.

For simulating the Pt/NiAlCoO structure, a three-layer slab model surface of NiAl<sub>2</sub>O<sub>4</sub> (101) substitution was built to calculate the adsorption energies and Gibbs free energies. Three p (3 × 3) unit cell expansions with some Co and Ni atoms instead of Al were used to model the surface of NiAlCoO. And the same Pt structure was supported to simulate Pt/NiAlCoO structures. Similarly, for the Pt/NiAlCoO/ZSM structure, a three-layer slab model surface of MFI structure substitution was built to calculate the adsorption energies and Gibbs free energies. Three p (3 × 3) unit cell expansions with (001) surface cut were used to model the surface of ZSM. The same Pt atoms and NiAlCoO structure were both supported on ZSM, which is named Pt/NiAlCoO/ZSM. A vacuum of 15 Å was used to simulate the surface under periodic boundary conditions.

The adsorption energy ( $E_{ads}$ ) of the H<sub>2</sub>O, Propane and the other molecule on the surface was calculated as follows (eq 1):

$$E_{ads} = E_{adsorbate + surface} - E_{surface} - E_{gas}, \quad (1)$$

where  $E_{surface}$  is the clean surface relaxation energy of the surface slab,  $E_{gas}$  is the energy of a free gas molecule under conditions of vacuum, and  $E_{adsorbate+surface}$  is the energy of the composite system.

According to the definition of  $\Delta G$ ,<sup>1-3</sup>

$$\Delta G = \Delta E + \Delta E_{ZPE} - T\Delta S + \Delta G_U + \Delta G_{pH} + \Delta G_{field} \quad (11)$$

$\Delta E$  is directly calculated by DFT.

$\Delta E_{\text{ZPE}}$  is obtained by calculating the vibration frequency of the intermediate (the ZPE corrects for the vibration of the adsorbate at 0 K). Due to the conservation of elements before and after each calculation step, in the calculation,  $\Delta E_{\text{ZPE}}$  can be approximated as 0.

Because of the temperature we defined as 0 K,  $T\Delta S = 0$ .<sup>4</sup>

$\Delta G_{\text{pH}}$  is the contribution of  $\text{H}^+$  concentration change to the Gibbs free energy. Due to the absence of pH changes in the gas-solid reaction, it can be ignored as 0.<sup>5</sup>

$\Delta G_{\text{U}}$  is the contribution of free energy in electrode potential. Electrocatalysis is not involved in this experiment, so it is ignored.

The correction term for electric double-layer free energy, known as  $\Delta G_{\text{field}}$ , has a negligible effect on overall free energy and can be ignored.<sup>3</sup>

For model optimization and simulation of reactions under ER and LH mechanisms, the calculations are performed at 0 K at a fixed cell volume, the differences in the Gibbs free energy should equal the differences in the total energy. However, the MvK mechanism was acquired under high temperature; the calculated temperature was set as 800 K. By this definition, a negative value of  $E_{\text{ads}}$  corresponds to exothermic and spontaneous adsorption processes.

The barrier energy,  $\Delta E$ , for a difference between the transition state energy and standard product formation enthalpy is defined as follows. The energy barrier calculation of  $^*\text{-CH}_3\text{CH}_2\text{CH}_3$  and  $^*\text{-O}$  to  $^*\text{-CH}_3\text{CH}_2\text{OHCH}_3$  on Pt/NiAlCoO as an example (eq 2):

$$\Delta E = (E_{CH_3CH_2CH_3 + O - Pt/NiAlCoO} - E_{stab - Pt/NiAlCoO}) - (E_{CH_3CH_2OHCH_3 - Pt/NiAlCoO}) \quad (2)$$

where  $E_{CH_3CH_2CH_3 + O - Pt/NiAlCoO}$  and  $E_{CH_3CH_2OHCH_3 - Pt/NiAlCoO}$  are the energies of the  $^*CH_3CH_2CH_3 + O^*$  and  $^*CH_3CH_2OHCH_3$  on Pt/NiAlCoO,  $E_{stab - Pt/NiAlCoO}$  is the energy of the Pt/NiAlCoO surface slab.

The differences in the Gibbs free energy should equal the differences in the total energy. By this definition, the lower the  $\Delta E$  is, the easier it is to react.

**Fig. S1.** TEM images of Pt/Ni<sub>1</sub>Co<sub>0.5</sub>AlO<sub>x</sub> (a and b), Pt/Ni<sub>1</sub>Co<sub>0.5</sub>AlO<sub>x</sub>@ZSM-5(5%) (c and d), Ni<sub>1</sub>Co<sub>0.5</sub>AlO<sub>x</sub>@Pt/ZSM-5(3%) (e and f), Ni<sub>1</sub>Co<sub>0.5</sub>AlO<sub>x</sub>@Pt/ZSM-5(5%) (g and h) and Ni<sub>1</sub>Co<sub>0.5</sub>AlO<sub>x</sub>@Pt/ZSM-5(10%) (i and j) catalysts.

**Fig. S2.** HRTEM images of Pt/Ni<sub>1</sub>Co<sub>0.5</sub>AlO<sub>x</sub> (a and b), Pt/Ni<sub>1</sub>Co<sub>0.5</sub>AlO<sub>x</sub>@ZSM-5(5%) (c and d), Ni<sub>1</sub>Co<sub>0.5</sub>AlO<sub>x</sub>@Pt/ZSM-5(3%) (e and f), Ni<sub>1</sub>Co<sub>0.5</sub>AlO<sub>x</sub>@Pt/ZSM-5(5%) (g and h) and Ni<sub>1</sub>Co<sub>0.5</sub>AlO<sub>x</sub>@Pt/ZSM-5(10%) (i and j) catalysts.

**Fig. S3.** The catalytic activity of Pt/Ni<sub>a</sub>Co<sub>b</sub>AlO<sub>x</sub> catalysts.

**Fig. S4.** Characteristic temperatures (T<sub>10</sub>, T<sub>50</sub> and T<sub>90</sub>) of propane oxidation on Pt/Ni<sub>1</sub>Co<sub>0.5</sub>AlO<sub>x</sub> and its core-shell catalysts under dry air (a) and 5 vol% H<sub>2</sub>O (b) conditions.

**Fig. S5.** Catalytic activity of Pt/Ni<sub>1</sub>Co<sub>0.5</sub>AlO<sub>x</sub> and Ni<sub>1</sub>Co<sub>0.5</sub>AlO<sub>x</sub>@Pt/ZSM-5(3%) catalysts under dry air and 5 vol% H<sub>2</sub>O conditions.

**Fig. S6.** E<sub>a</sub> and reaction rate versus T<sub>90</sub> of Pt/Ni<sub>1</sub>Co<sub>0.5</sub>AlO<sub>x</sub> and its core-shell catalysts under dry air (a) and 5 vol% H<sub>2</sub>O (b) conditions.

**Fig. S7.** R<sub>s</sub> (reaction rates based on the specific area of catalysts) and R<sub>m</sub> (reaction rates based on the mass of catalysts) of Pt/Ni<sub>1</sub>Co<sub>0.5</sub>AlO<sub>x</sub> and its core-shell catalysts under dry air and 5 vol% H<sub>2</sub>O conditions.

**Fig. S8.** TOF<sub>Pt</sub> (a), TOF<sub>Ni</sub> (b) and TOF<sub>Co</sub> (c) values of Pt/Ni<sub>1</sub>Co<sub>0.5</sub>AlO<sub>x</sub> and its core-shell catalysts under dry air and 5 vol% H<sub>2</sub>O conditions.

**Fig. S9.** TOF<sub>Pt</sub> (f) of Pt/Ni<sub>1</sub>Co<sub>0.5</sub>AlO<sub>x</sub> and its core-shell catalysts under dry air conditions.

**Fig. S10.** The thermal stability of Pt/Ni<sub>1</sub>Co<sub>0.5</sub>AlO<sub>x</sub> and its core-shell catalysts.

Reaction conditions: 2,000 ppm propane, WHSV = 30,000 mL·g<sup>-1</sup>·h<sup>-1</sup>.

**Fig. S11.** The XRD profiles of Pt/Ni<sub>1</sub>Co<sub>0.5</sub>AlO<sub>x</sub> and its core-shell catalysts.

**Fig. S12.** ΔBE (eV) (difference between binding energies of the same species on different catalysts based on Pt/Ni<sub>1</sub>Co<sub>0.5</sub>AlO<sub>x</sub> catalyst) of O<sub>latt</sub> and O<sub>ads</sub> (a), and Co<sup>3+</sup> and Co<sup>2+</sup> (b) on Pt/Ni<sub>1</sub>Co<sub>0.5</sub>AlO<sub>x</sub>, Pt/Ni<sub>1</sub>Co<sub>0.5</sub>AlO<sub>x</sub>@ZSM-5(5%), Ni<sub>1</sub>Co<sub>0.5</sub>AlO<sub>x</sub>@Pt/ZSM-5(3%), Ni<sub>1</sub>Co<sub>0.5</sub>AlO<sub>x</sub>@Pt/ZSM-5(5%) and Ni<sub>1</sub>Co<sub>0.5</sub>AlO<sub>x</sub>@Pt/ZSM-5(10%) catalysts.

**Fig. S13.** XPS full spectra (a) and Si 2p spectra (b) of Pt/Ni<sub>1</sub>Co<sub>0.5</sub>AlO<sub>x</sub> and its core-shell catalysts.

**Fig. S14.** Ratios of Pt<sup>0</sup>/Pt<sub>total</sub>, O<sub>ads</sub>/O<sub>total</sub>, Co<sup>3+</sup>/Co<sub>total</sub> versus T<sub>90</sub> of Pt/Ni<sub>1</sub>Co<sub>0.5</sub>AlO<sub>x</sub> and its core-shell catalysts.

**Fig. S15.** Plot of linear correlation between H<sub>2</sub> consumption and H<sub>2</sub>-TPR profile area.

**Fig. S16.** Profiles of the area of NH<sub>3</sub>-TPD (a) and O<sub>2</sub>-TPD (b) of Pt/Ni<sub>1</sub>Co<sub>0.5</sub>AlO<sub>x</sub> and its core-shell catalysts.

**Fig. S17.** In-situ DRIFTS spectra of propane oxidation at air (a) and at air/SO<sub>2</sub> (b) of Ni<sub>1</sub>Co<sub>0.5</sub>AlO<sub>x</sub>@Pt/ZSM-5(3%) catalyst.

**Fig. S18.** The oxidative decomposition pathway of propane on the Pt/NiCoAlO<sub>x</sub>.

**Table S1** Pore structure parameters of Pt/Ni<sub>1</sub>Co<sub>0.5</sub>AlO<sub>x</sub> and its core-shell catalysts.

**Table S2** DFT calculated geometric structural parameters of propane adsorbed on Pt/NiCoAlO<sub>x</sub> and NiCoAlO<sub>x</sub>@Pt/ZSM-5 surfaces.

**Table S3** Bader charge quantified state value of Pt/NiCoAlO<sub>x</sub> and NiCoAlO<sub>x</sub>@Pt/ZSM-5.

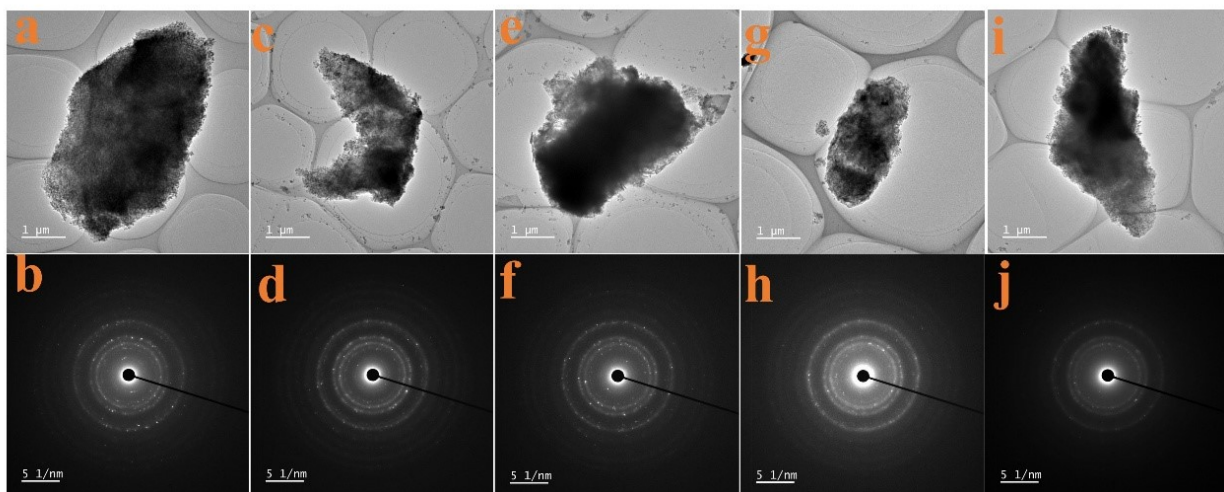

**Fig. S1.** TEM images of Pt/Ni<sub>1</sub>Co<sub>0.5</sub>AlO<sub>x</sub> (a and b), Pt/Ni<sub>1</sub>Co<sub>0.5</sub>AlO<sub>x</sub>@ZSM-5(5%) (c and d), Ni<sub>1</sub>Co<sub>0.5</sub>AlO<sub>x</sub>@Pt/ZSM-5(3%) (e and f), Ni<sub>1</sub>Co<sub>0.5</sub>AlO<sub>x</sub>@Pt/ZSM-5(5%) (g and h) and Ni<sub>1</sub>Co<sub>0.5</sub>AlO<sub>x</sub>@Pt/ZSM-5(10%) (i and j) catalysts.

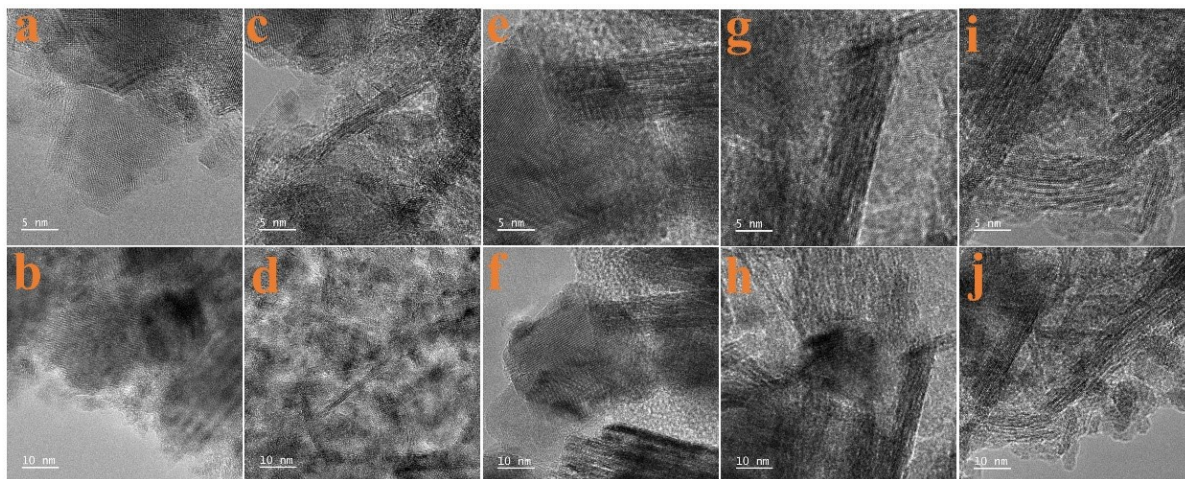

**Fig. S2.** HRTEM images of Pt/Ni<sub>1</sub>Co<sub>0.5</sub>AlO<sub>x</sub> (a and b), Pt/Ni<sub>1</sub>Co<sub>0.5</sub>AlO<sub>x</sub>@ZSM-5(5%) (c and d), Ni<sub>1</sub>Co<sub>0.5</sub>AlO<sub>x</sub>@Pt/ZSM-5(3%) (e and f), Ni<sub>1</sub>Co<sub>0.5</sub>AlO<sub>x</sub>@Pt/ZSM-5(5%) (g and h) and Ni<sub>1</sub>Co<sub>0.5</sub>AlO<sub>x</sub>@Pt/ZSM-5(10%) (i and j) catalysts.

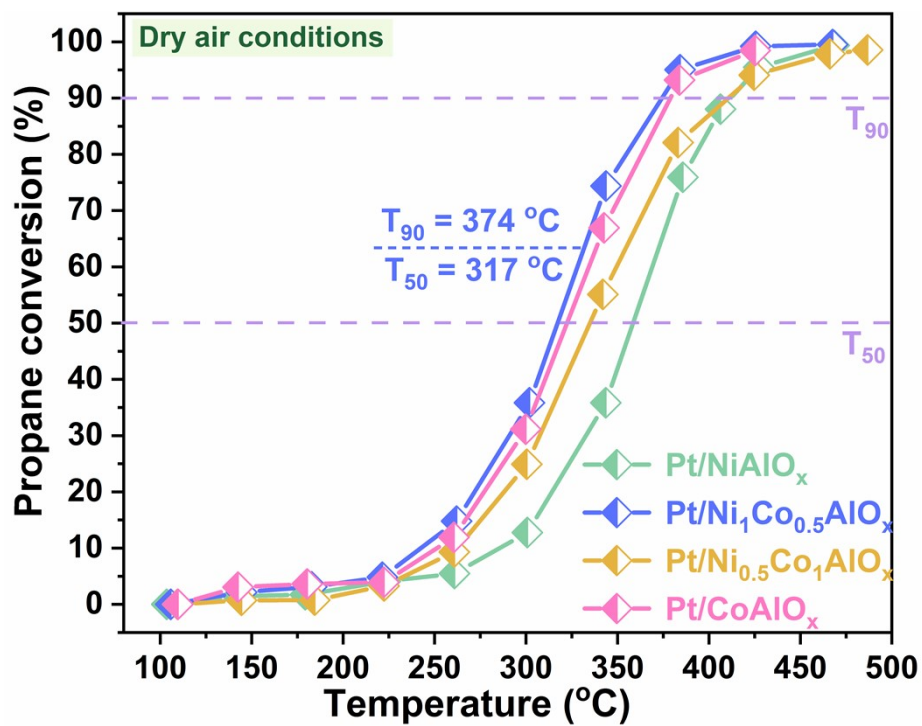

Fig. S3. The catalytic activity of Pt/Ni<sub>a</sub>Co<sub>b</sub>AlO<sub>x</sub> catalysts.

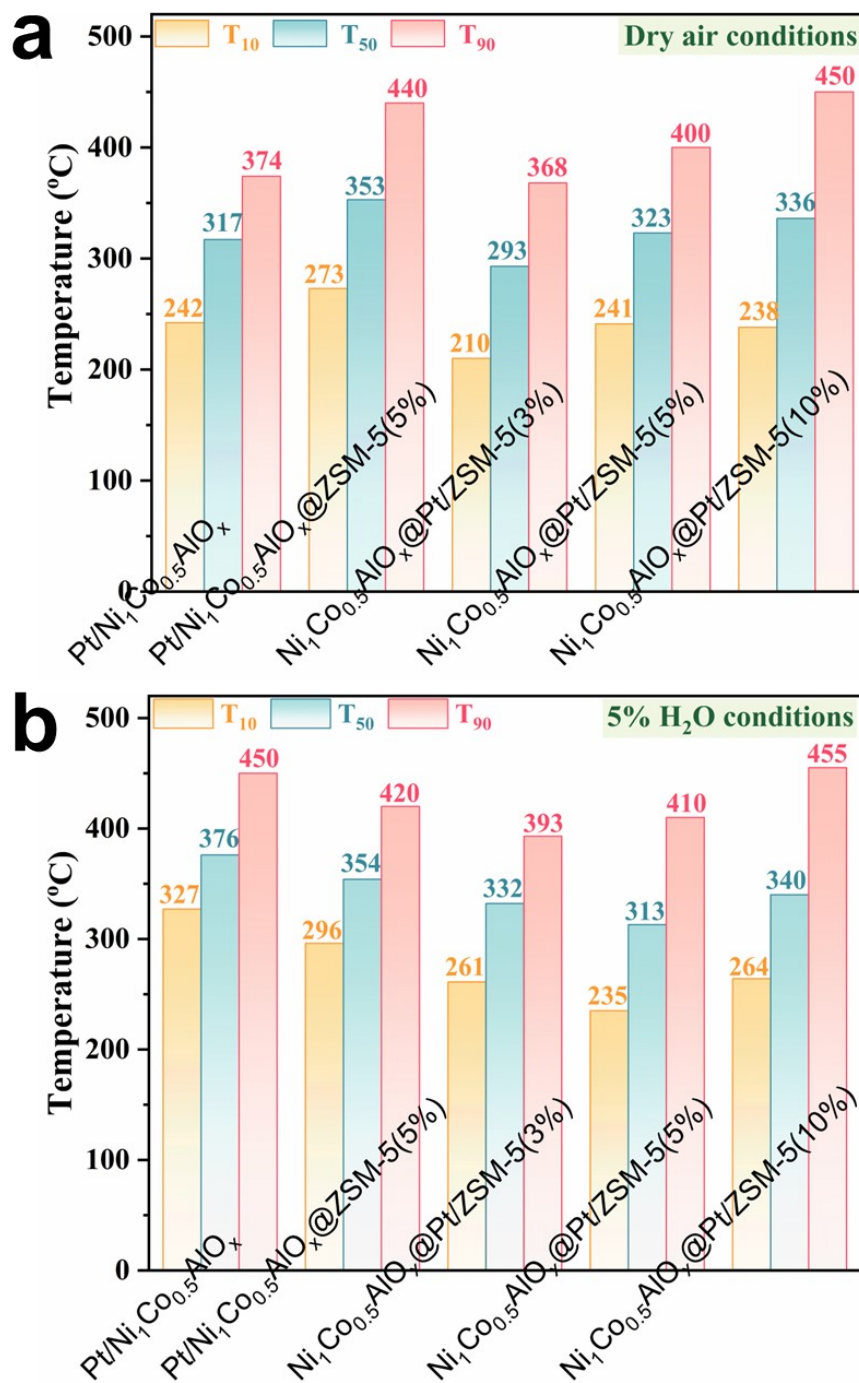

**Fig. S4.** Characteristic temperatures ( $T_{10}$ ,  $T_{50}$  and  $T_{90}$ ) of propane oxidation on Pt/Ni<sub>1</sub>Co<sub>0.5</sub>AlO<sub>x</sub> and its core-shell catalysts under dry air (a) and 5 vol% H<sub>2</sub>O (b) conditions.

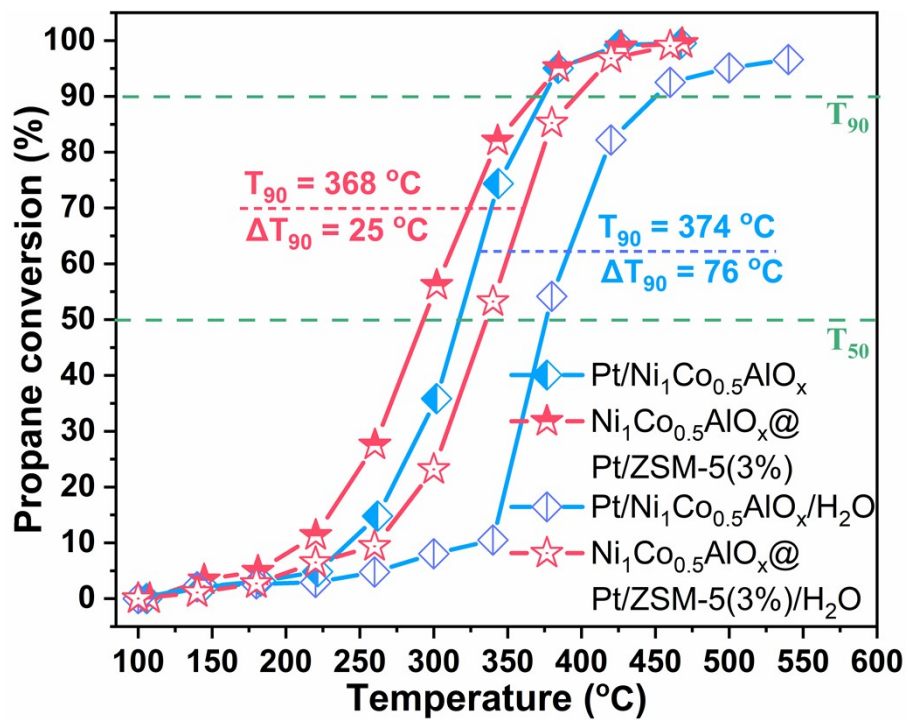

Fig. S5. Catalytic activity of Pt/Ni<sub>1</sub>Co<sub>0.5</sub>AlO<sub>x</sub> and Ni<sub>1</sub>Co<sub>0.5</sub>AlO<sub>x</sub>@Pt/ZSM-5(3%)

catalysts under dry air and 5 vol% H<sub>2</sub>O conditions.

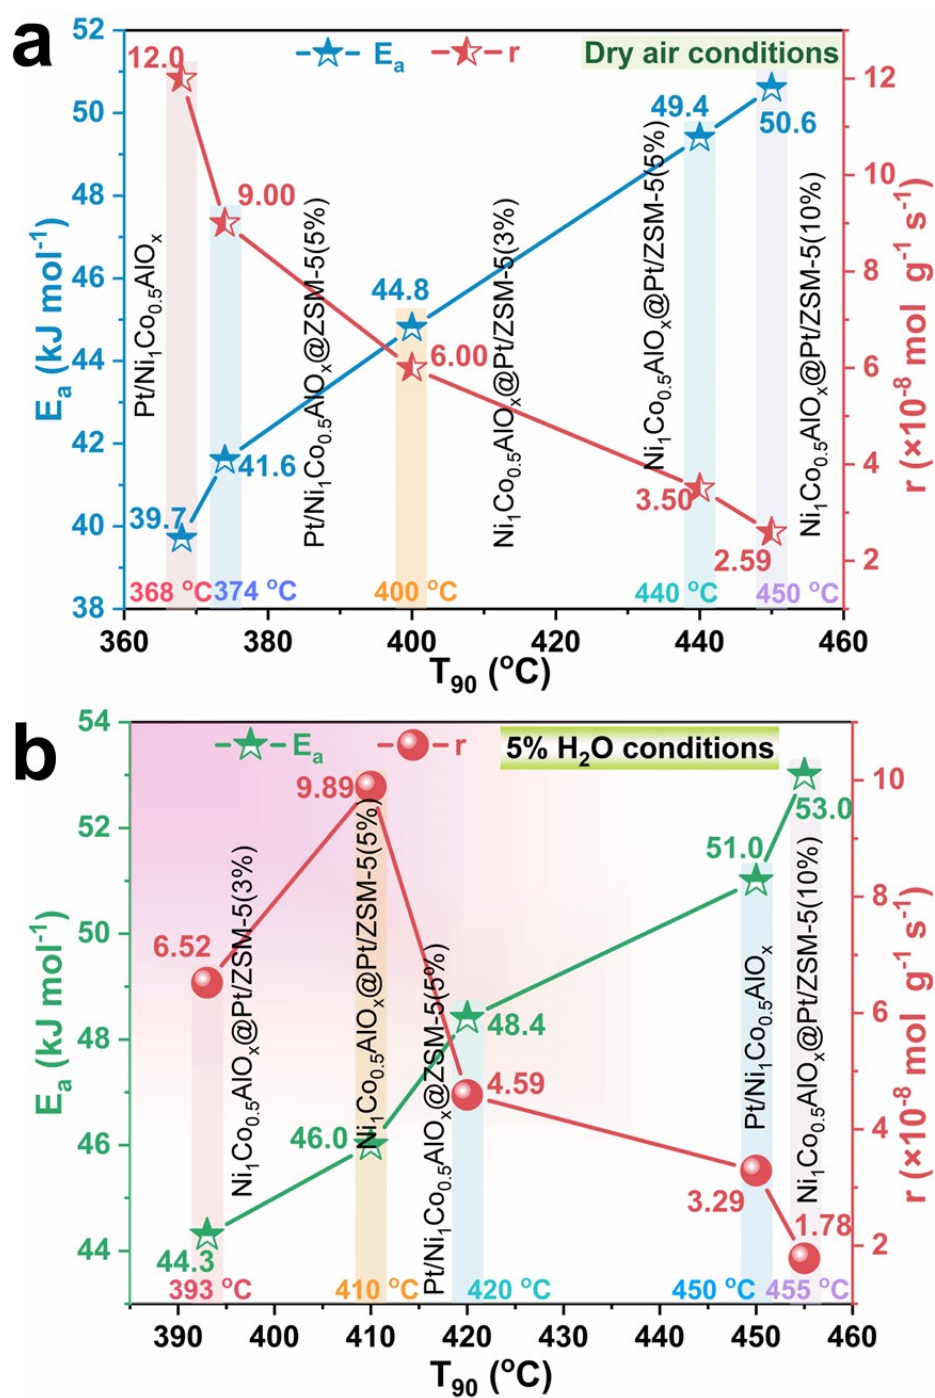

Fig. S6.  $E_a$  and reaction rate versus  $T_{90}$  of Pt/Ni<sub>1</sub>Co<sub>0.5</sub>AlO<sub>x</sub> and its core-shell catalysts under dry air (a) and 5 vol% H<sub>2</sub>O (b) conditions.

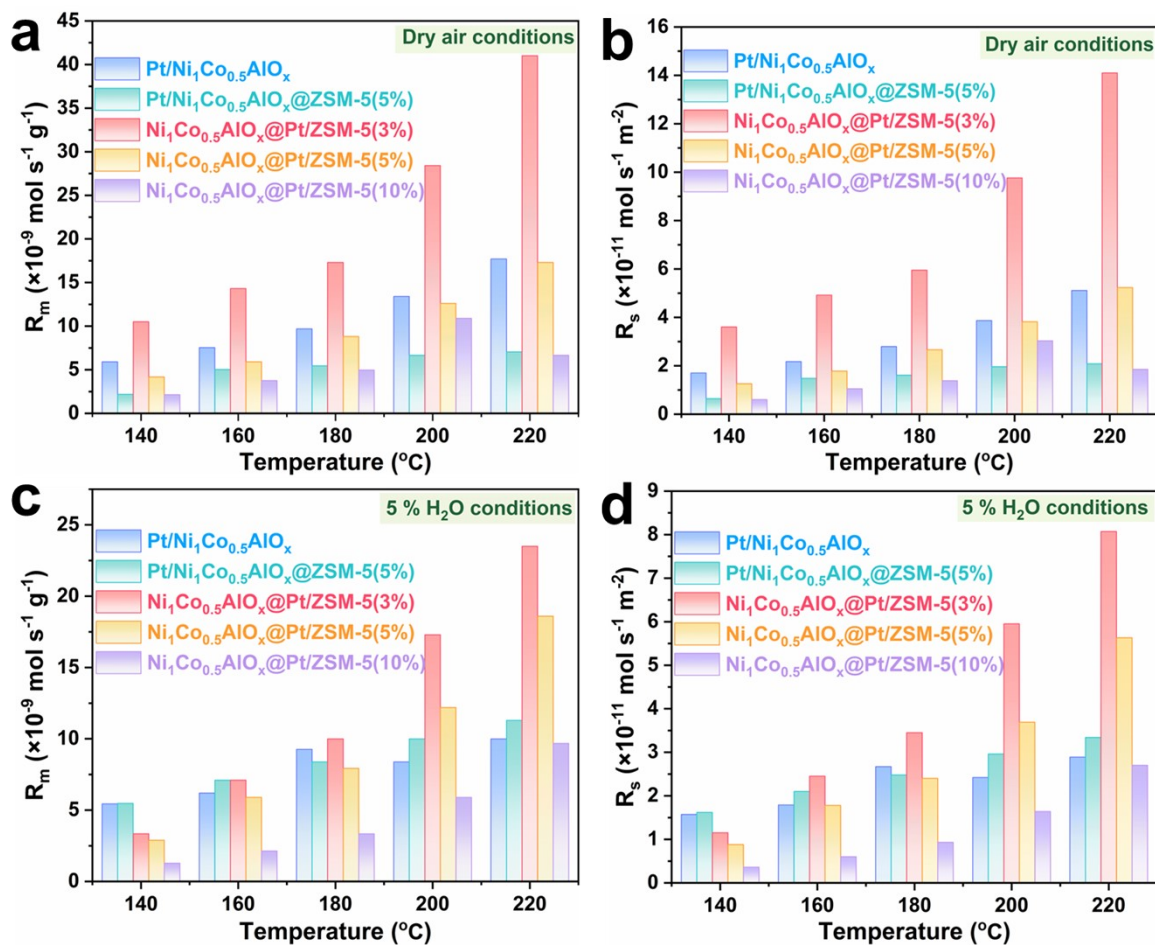

**Fig. S7.**  $R_s$  (reaction rates based on the specific area of catalysts) and  $R_m$  (reaction rates based on the mass of catalysts) of Pt/Ni<sub>1</sub>Co<sub>0.5</sub>AlO<sub>x</sub> and its core-shell catalysts under dry air and 5 vol% H<sub>2</sub>O conditions.

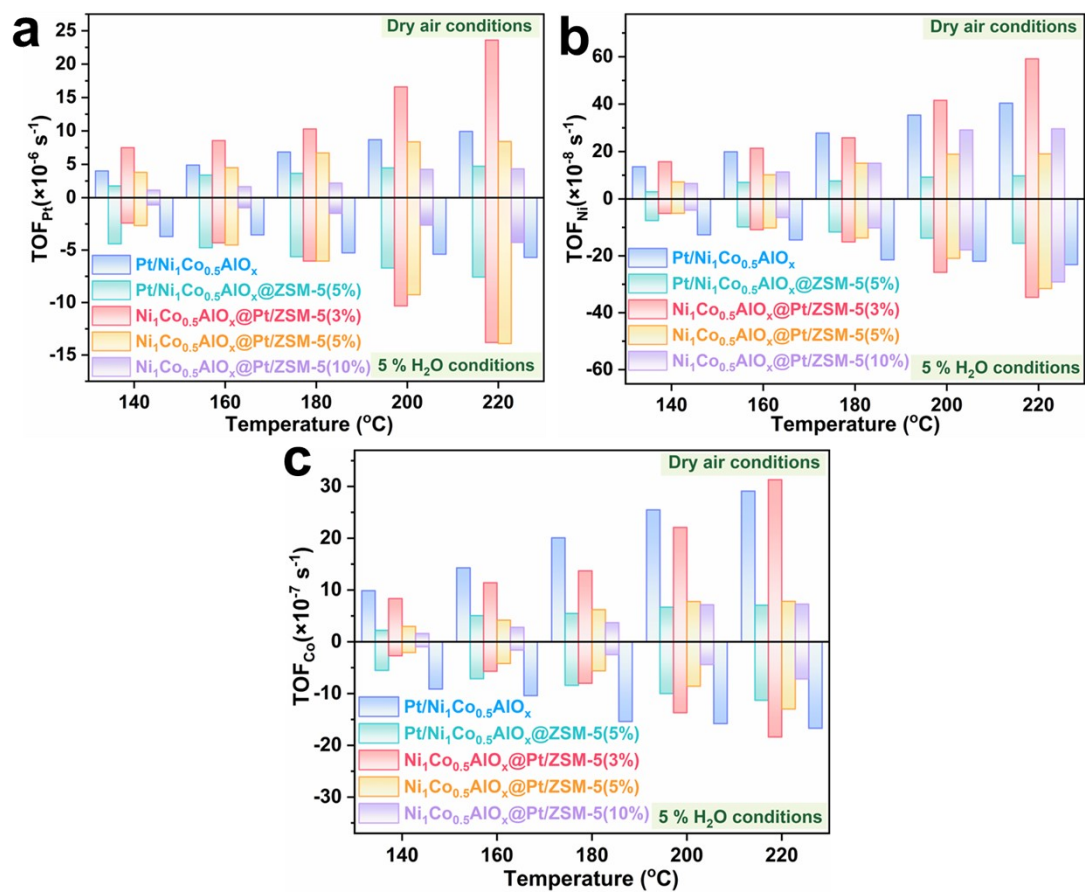

**Fig. S8.** TOF<sub>Pt</sub> (a), TOF<sub>Ni</sub> (b) and TOF<sub>Co</sub> (c) values of Pt/Ni<sub>1</sub>Co<sub>0.5</sub>AlO<sub>x</sub> and its core-shell catalysts under dry air and 5 vol% H<sub>2</sub>O conditions.

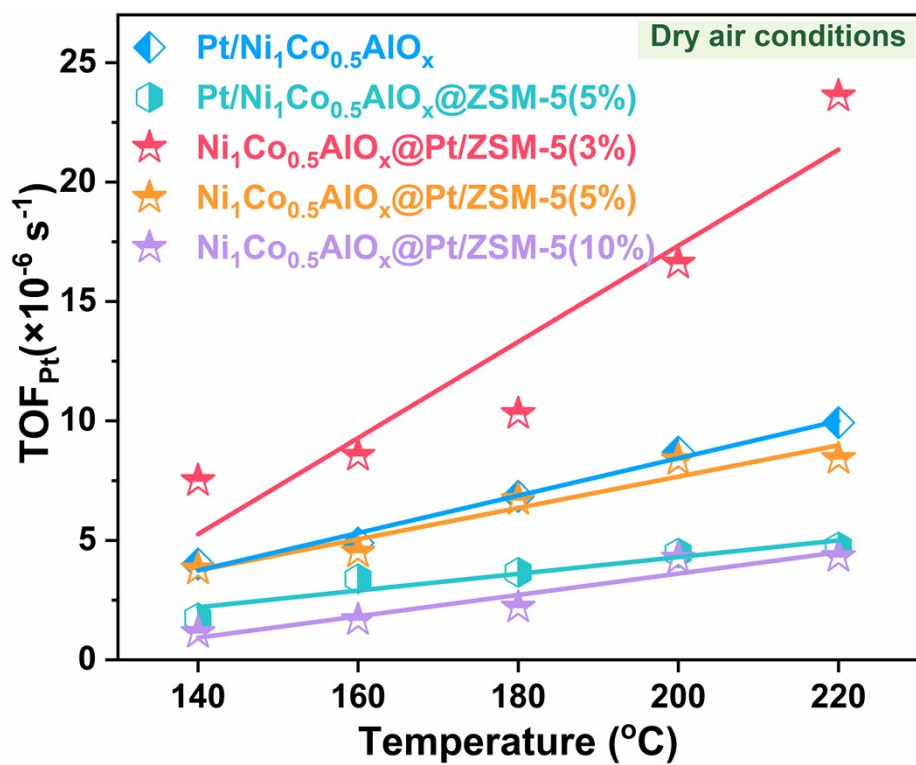

Fig. S9. TOF<sub>Pt</sub> (f) of Pt/Ni<sub>1</sub>Co<sub>0.5</sub>AlO<sub>x</sub> and its core-shell catalysts under dry air conditions.

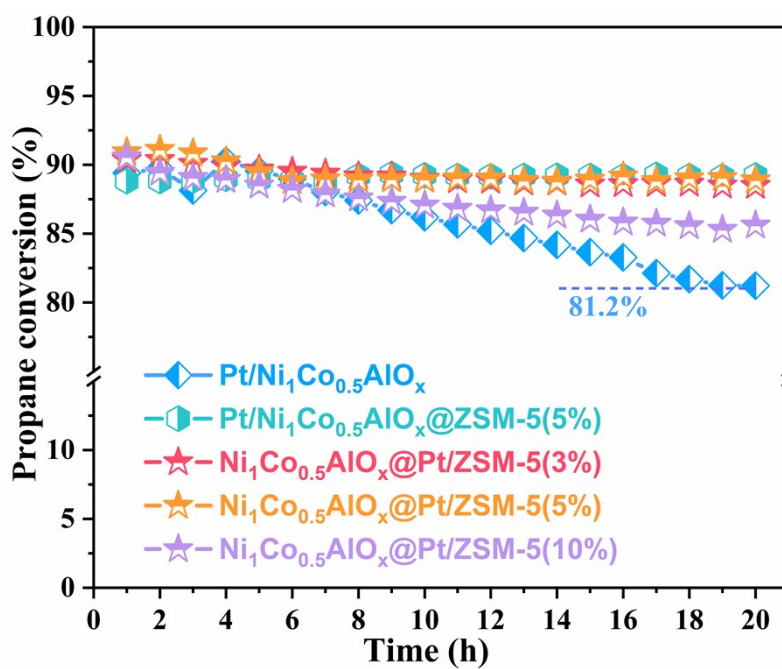

**Fig. S10.** The thermal stability of Pt/Ni<sub>1</sub>Co<sub>0.5</sub>AlO<sub>x</sub> and its core-shell catalysts.

Reaction conditions: 2,000 ppm propane, WHSV = 30,000 mL·g<sup>-1</sup>·h<sup>-1</sup>.

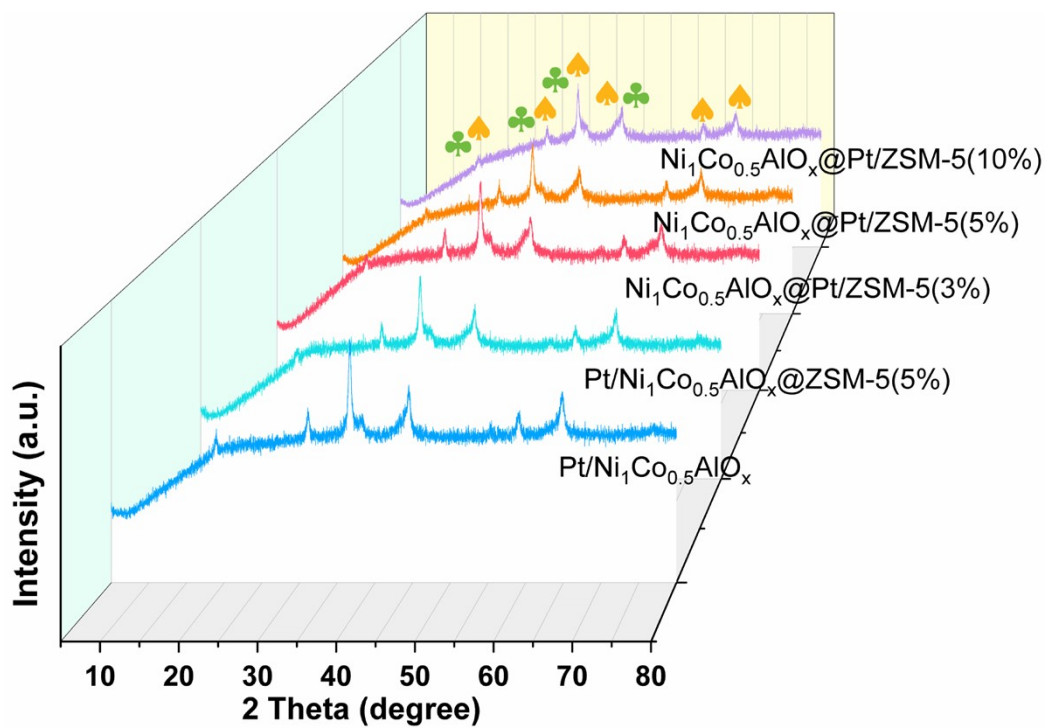

Fig. S11. The XRD profiles of Pt/Ni<sub>1</sub>Co<sub>0.5</sub>AlO<sub>x</sub> and its core-shell catalysts.

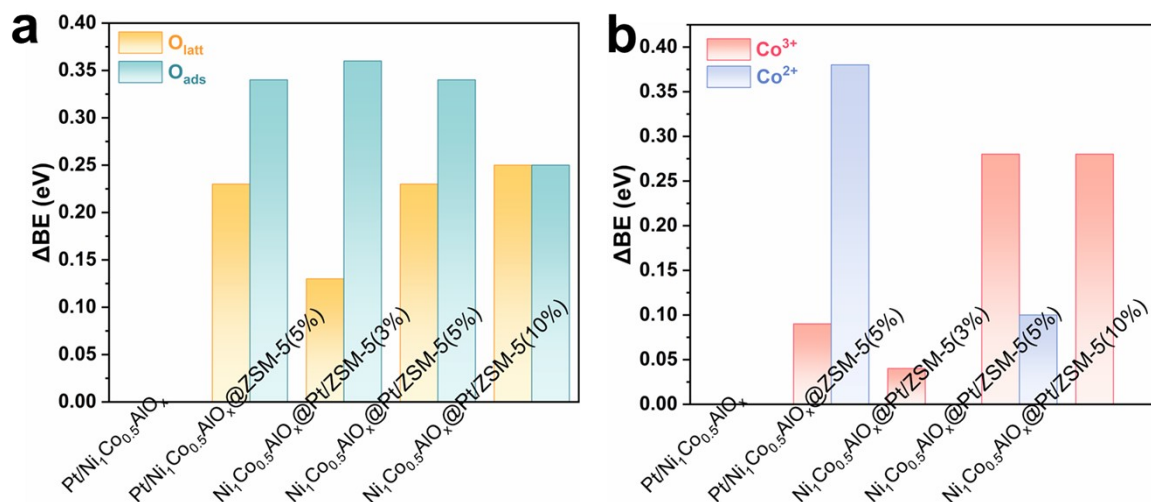

**Fig. S12.**  $\Delta BE$  (eV) (difference between binding energies of the same species on different catalysts on basis of Pt/Ni<sub>1</sub>Co<sub>0.5</sub>AlO<sub>x</sub> catalyst) of  $O_{latt}$  and  $O_{ads}$  (a), and  $Co^{3+}$  and  $Co^{2+}$  (b) on Pt/Ni<sub>1</sub>Co<sub>0.5</sub>AlO<sub>x</sub>, Pt/Ni<sub>1</sub>Co<sub>0.5</sub>AlO<sub>x</sub>@ZSM-5(5%), Ni<sub>1</sub>Co<sub>0.5</sub>AlO<sub>x</sub>@Pt/ZSM-5(3%), Ni<sub>1</sub>Co<sub>0.5</sub>AlO<sub>x</sub>@Pt/ZSM-5(5%) and Ni<sub>1</sub>Co<sub>0.5</sub>AlO<sub>x</sub>@Pt/ZSM-5(10%) catalysts.

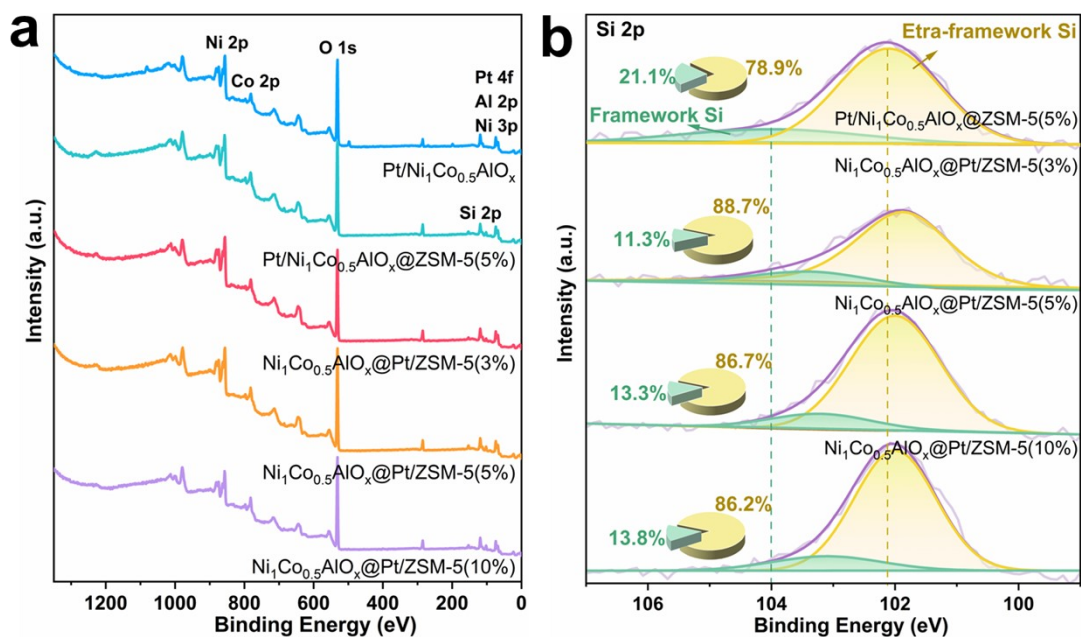

**Fig. S13.** XPS full spectra (a) and Si 2p spectra (b) of Pt/Ni<sub>1</sub>Co<sub>0.5</sub>AlO<sub>x</sub> and its core-shell catalysts.

The Si 2p spectra in Fig. S13 display two peaks at 101.85-102.10 eV and 103.10-104.00 eV, attributed to framework Si (mainly Si-O-Si and Si-O-Al) and extra-framework Si species, respectively. The non-polar Si-O-Si species within the ZSM-5 framework readily interact with polar water molecules, thereby conferring enhanced hydrophobicity upon ZSM-5. Following encapsulation within ZSM-5 and Pt/ZSM-5 shells, the catalyst exhibits a marked increase in Si framework content, demonstrating superior water resistance compared to the unencapsulated Pt/Ni<sub>1</sub>Co<sub>0.5</sub>AlO<sub>x</sub> catalyst.

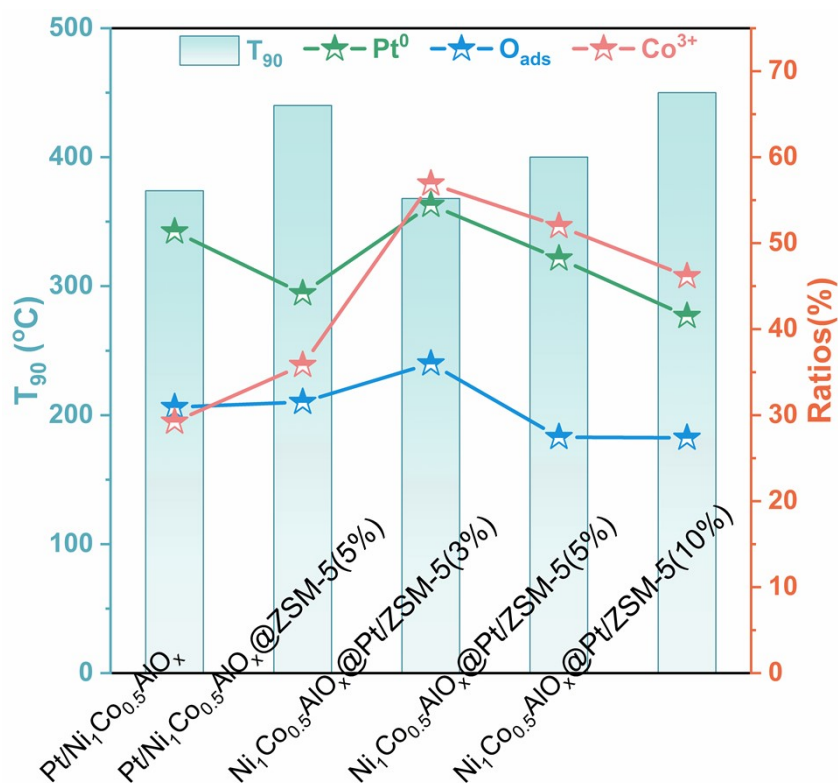

**Fig. S14.** Ratios of  $Pt^0/Pt_{total}$ ,  $O_{ads}/O_{total}$ ,  $Co^{3+}/Co_{total}$  versus  $T_{90}$  of  $Pt/Ni_1Co_{0.5}AlO_x$  and its core-shell catalysts.

As shown in Fig. S14, the  $T_{90}$  value exhibits a strong negative correlation with the concentration of the primary active species, indicating that elevated levels of  $Pt^0$ ,  $O_{ads}$ , and  $Co^{3+}$  significantly enhance the oxidation rate of propane at lower temperatures. These correlations highlight the pivotal contribution of these species to low-temperature catalytic performance, wherein  $Pt^0$  provides abundant active sites for reactant activation,  $O_{ads}$  offers highly reactive oxygen for rapid oxidation, and  $Co^{3+}$  promotes redox cycling and lattice oxygen replenishment, collectively enhancing reaction kinetics.

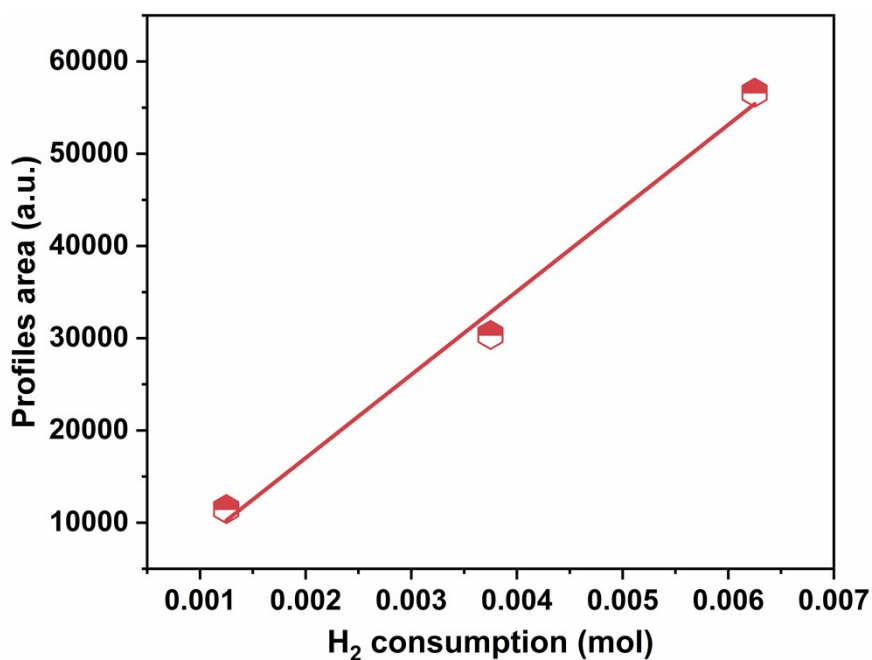

**Fig. S15.** Plot of linear correlation between H<sub>2</sub> consumption and H<sub>2</sub>-TPR profile area.

The quantitative H<sub>2</sub> consumption followed the order: Pt/Ni<sub>0.5</sub>Co<sub>1</sub>AlO<sub>x</sub> (4.98 mmol/g) > Ni<sub>1</sub>Co<sub>0.5</sub>AlO<sub>x</sub>@Pt/ZSM-5(3%) (4.96 mmol/g) > Ni<sub>1</sub>Co<sub>0.5</sub>AlO<sub>x</sub>@Pt/ZSM-5(5%) (4.77 mmol/g) > Pt/Ni<sub>0.5</sub>Co<sub>1</sub>AlO<sub>x</sub>@ZSM-5(5%) (4.73 mmol/g) > Ni<sub>1</sub>Co<sub>0.5</sub>AlO<sub>x</sub>@Pt/ZSM-5(10%) (4.32 mmol/g), which is essentially consistent with the order of catalytic activity. The relatively high H<sub>2</sub> uptakes of Pt/Ni<sub>1</sub>Co<sub>0.5</sub>AlO<sub>x</sub> and Ni<sub>1</sub>Co<sub>0.5</sub>AlO<sub>x</sub>@Pt/ZSM-5(3%) catalysts suggest superior redox capacity, facilitating C-H bond activation and thus correlating with their higher catalytic activity than other catalysts.

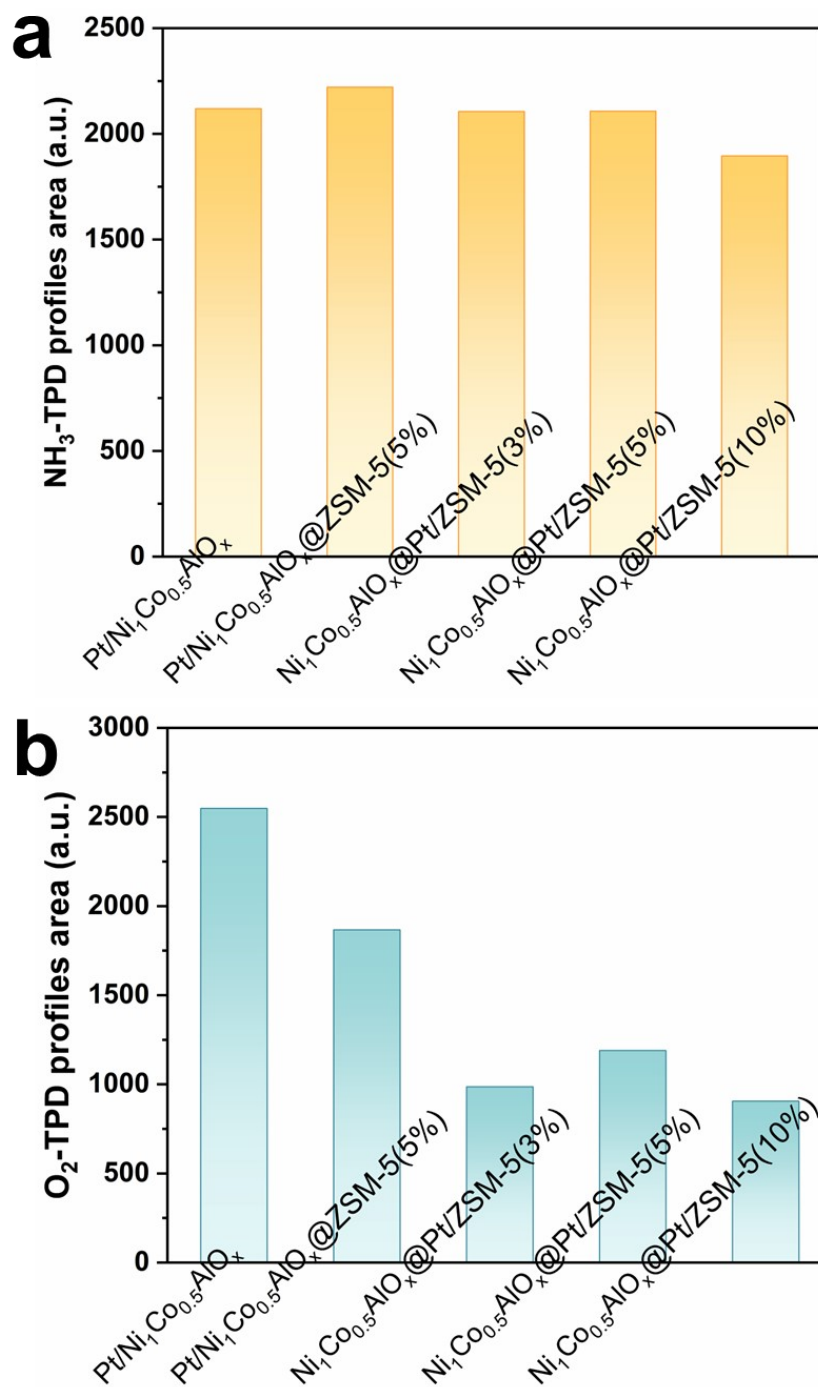

**Fig. S16.** Profiles of the area of NH<sub>3</sub>-TPD (a) and O<sub>2</sub>-TPD (b) of Pt/Ni<sub>1</sub>Co<sub>0.5</sub>AlO<sub>x</sub> and its core-shell catalysts.

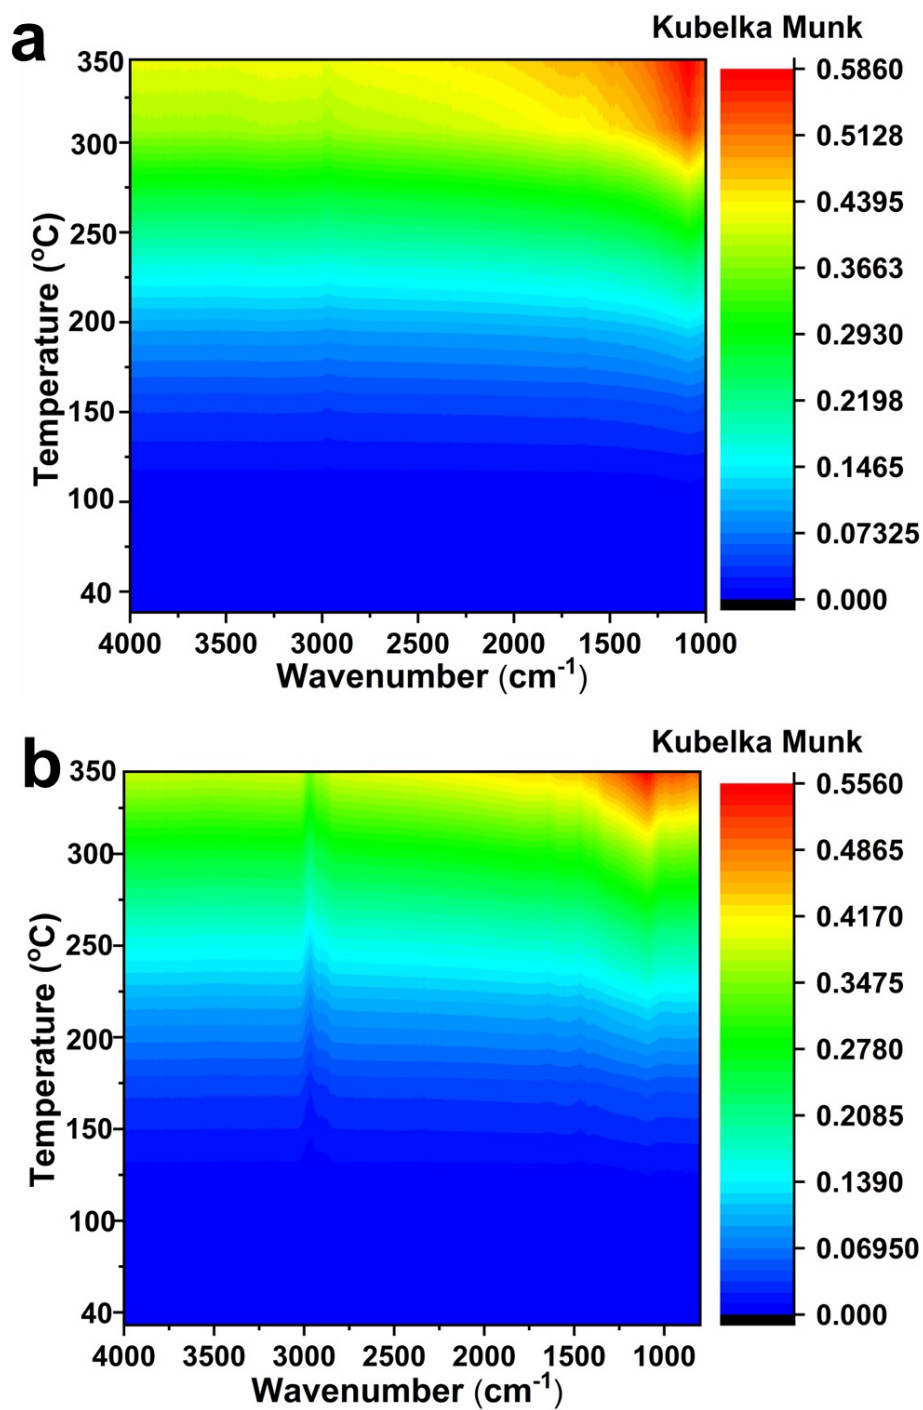

**Fig. S17.** In-situ DRIFTS spectra of propane oxidation at air (a) and at air/SO<sub>2</sub> (b) of

Ni<sub>1</sub>Co<sub>0.5</sub>AlO<sub>x</sub>@Pt/ZSM-5(3%) catalyst.

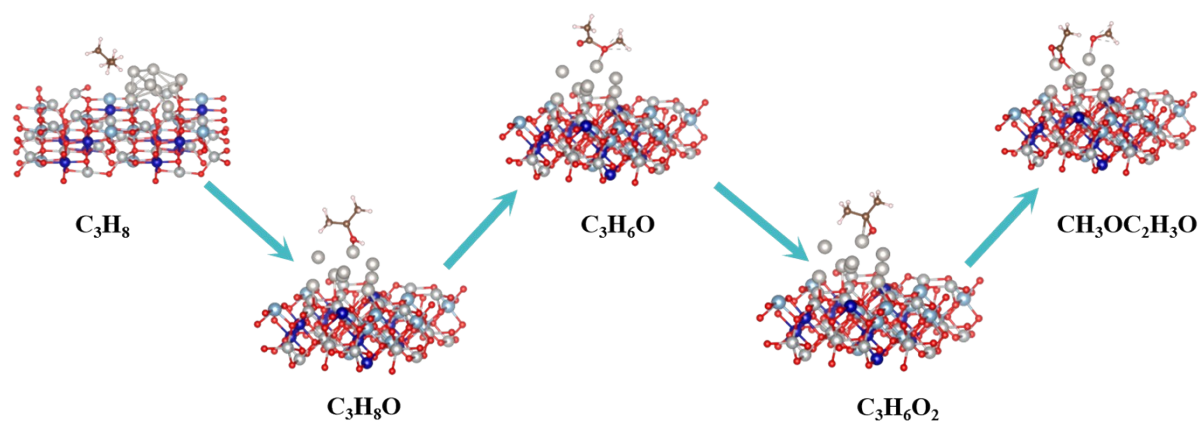

**Fig. S18.** The oxidative decomposition pathway of propane on the Pt/NiCoAlO<sub>x</sub>.

**Table S1** Pore structure parameters of Pt/Ni<sub>1</sub>Co<sub>0.5</sub>AlO<sub>x</sub> and its core-shell catalysts.

| Catalysts                                                             | Surface area <sup>a</sup><br>(m <sup>2</sup> /g) | Average pore size <sup>a</sup><br>(nm) | Pore volume <sup>a</sup><br>(cm <sup>3</sup> /g) |
|-----------------------------------------------------------------------|--------------------------------------------------|----------------------------------------|--------------------------------------------------|
| Pt/Ni <sub>1</sub> Co <sub>0.5</sub> AlO <sub>x</sub>                 | 139                                              | 3.46                                   | 0.17                                             |
| Pt/Ni <sub>1</sub> Co <sub>0.5</sub> AlO <sub>x</sub> @ZSM-<br>5(5%)  | 136                                              | 4.30                                   | 0.20                                             |
| Ni <sub>1</sub> Co <sub>0.5</sub> AlO <sub>x</sub> @Pt/ZSM-<br>5(3%)  | 116                                              | 6.95                                   | 0.26                                             |
| Ni <sub>1</sub> Co <sub>0.5</sub> AlO <sub>x</sub> @Pt/ZSM-<br>5(5%)  | 132                                              | 4.92                                   | 0.22                                             |
| Ni <sub>1</sub> Co <sub>0.5</sub> AlO <sub>x</sub> @Pt/ZSM-<br>5(10%) | 144                                              | 4.49                                   | 0.22                                             |

<sup>a</sup> Calculated using the BET method.

**Table S2** DFT calculated geometric structural parameters of propane adsorbed onPt/NiCoAlO<sub>x</sub> and NiCoAlO<sub>x</sub>@Pt/ZSM-5 surfaces.

| <b>Sample</b>                            | <b>C1-<br/>C2 (Å)</b> | <b>ΔC1-<br/>C2 (Å)</b> | <b>C2-<br/>C3 (Å)</b> | <b>ΔC2-C3 (Å)</b>            | <b>C1-C2-C3 (°)</b>          |
|------------------------------------------|-----------------------|------------------------|-----------------------|------------------------------|------------------------------|
| <b>C<sub>3</sub>H<sub>8</sub></b>        | 1.5294                | --                     | 1.5285                | --                           | 112.8815                     |
| <b>Pt/NiCoAlO<sub>x</sub></b>            | 1.5239                | -0.0015                | 1.5223                | 0.0001                       | 114.8708                     |
| <b>NiCoAlO<sub>x</sub>@<br/>Pt/ZSM-5</b> | 1.5265                | 0.0053                 | 1.5258                | 0.0013                       | 113.2639                     |
| <b>Sample</b>                            | <b>C2-<br/>H4 (Å)</b> | <b>ΔC2-<br/>H4 (Å)</b> | <b>C2-<br/>H5 (Å)</b> | <b>C1-C2-<br/>H4(H5) (°)</b> | <b>C3-C2-<br/>H4(H5) (°)</b> |
| <b>C<sub>3</sub>H<sub>8</sub></b>        | 1.1026                | --                     | 1.1028                | 109.4429                     | 109.4656                     |
| <b>Pt/NiCoAlO<sub>x</sub></b>            | 1.1020                | 0.0020                 | 1.1792                | 107.6015                     | 109.6308                     |
| <b>NiCoAlO<sub>x</sub>@<br/>Pt/ZSM-5</b> | 1.1078                | 0.1095                 | 1.1271                | 108.3162                     | 109.0214                     |

**Table S3** Bader charge quantified state value of Pt/NiCoAlO<sub>x</sub> and NiCoAlO<sub>x</sub>@Pt/ZSM-5.

| Sample                         | Electron | Average Bader charge | Average state value |
|--------------------------------|----------|----------------------|---------------------|
| Pt/NiCoAlO <sub>x</sub>        | Pt       | 9.975                | 0.025               |
|                                | Co       | 7.787                | 2.426               |
|                                | Ni       | 8.940                | 2.120               |
|                                | Al       | 0.646                | 4.707               |
| NiCoAlO <sub>x</sub> @Pt/ZSM-5 | Pt       | 10.030               | -0.030              |
|                                | Co       | 7.727                | 2.546               |
|                                | Ni       | 9.090                | 1.820               |
|                                | Al       | 0.596                | 4.808               |

## References

1. W. Song, C. Li, P. Ma, X. Liu, Y. Guo, M. Jia, W. Zhang, C. He, Computational screening of transition metal atom doped C<sub>3</sub>N as electrocatalysts for nitrogen fixation, *Mol. Catal.*, 2023, **535**, 112888.
2. X. Mao, Z. Gu, C. Yan, A. Du, Unlocking the potential of ruthenium catalysts for nitrogen fixation with subsurface oxygen, *J. Mater. Chem. A*, 2021, **9**, 6575-6582.
3. X. Liao, R. Lu, L. Xia, Q. Liu, H. Wang, K. Zhao, Z. Wang, Y. Zhao, Density functional theory for electrocatalysis, *Energy Environ. Mater.*, 2021, **5**, 157-185.
4. W. Kong, J. Xu, Y. Tong, Y. Ding, J. Wang, B. Li, X. Wei, L. Zhao, Construction of dual active sites for efficient alkaline hydrogen evolution: single-metal-atoms supported on BC<sub>2</sub>N monolayers, *Phys. Chem. Chem. Phys.*, 2022, **24**, 29141-29150.
5. Z. Wu, M. Karamad, X. Yong, Q. Huang, D. Cullen, P. Zhu, C. Xia, Q. Xiao, M. Shakouri, F. Chen, J. Kim, Y. Xia, K. Heck, Y. Hu, M. Wong, Q. Li, I. Gates, S. Siahrostami, H. Wang, Electrochemical ammonia synthesis via nitrate reduction on Fe single atom catalyst, *Nat. Commun.*, 2021, **12**, 2870.
